## RESEARCH ARTICLE

# Pit viper thermography: the pit organ used by crotaline snakes to detect thermal contrast has poor spatial resolution

Rulon W. Clark<sup>1,\*</sup>, George S. Bakken<sup>1,2,\*</sup>, Evan J. Reed<sup>1</sup> and Ashana Soni<sup>1</sup>

## ABSTRACT

Pit vipers detect infrared radiation by means of temperature contrasts created on their pit organ membranes. Signals from pit organs integrate with visual signals in the optic tectum, leading to the conjecture that the facial pits operate as an extension of the visual system. Because similar mechanisms underlie thermal imaging technology, imagery from thermal cameras is often used to infer how pit vipers perceive their environment. However, pit organs lack a focusing mechanism, and biophysical models predict that pit organs should have poor spatial resolution compared with thermal imaging cameras. Nevertheless, behavioral studies occasionally suggest pits may have better resolution than predicted by biophysical models, indicating that processing in the central nervous system may improve imaging. To estimate the spatial resolution of the neural image informing behavior, we recorded snake responses evoked by targets moving across backgrounds composed of two contrasting temperatures with an average temperature equal to the target temperature. An unresolved background would appear uniform; thus, the target would be detectable only if the background pattern were resolved. Western rattlesnakes (*Crotalus oreganus*) displayed no statistically significant responses to targets presented in front of patterned backgrounds, regardless of the temperature contrasts or spatial frequencies within the background, but responded strongly to targets presented in front of homogeneous backgrounds. We found no evidence that the pit organ system can resolve spatial details subtending an angle of 9 deg or less. We discuss the implications of these results for understanding pit organ function in ecologically relevant habitats with thermal heterogeneity.

**KEY WORDS:** Rattlesnake, Facial pits, Infrared radiation, Thermal imaging, Behavior, *Crotalus oreganus*

## INTRODUCTION

The pit viper thermal imaging system has attracted considerable attention in both professional literature and popular media. Images and video recorded by commercial thermal imagers are often used to visualize what a pit viper might perceive (e.g. in den Bosch, 1983; Kardong, 1986; Rundus et al., 2007). However, there is reason to suspect that the high resolution of such images does not accurately simulate what pit vipers perceive. A better understanding

of the quality of the neural image informing pit viper behavior is needed.

The loreal pit organ from which crotaline snakes derive their common name has long been known to be an integral aspect of their visual system (reviewed by Goris, 2011). Although the pit organ is structured as a lensless chamber eye similar to that of *Nautilus* (Land and Fernald, 1992), the optical anatomy and sensory physiology differ from those of visual systems (Goris, 2011). Most vertebrate and invertebrate eyes utilize a lens to focus electromagnetic radiation onto specialized pigments that absorb visible light (wavelength range ~400–800 nm). In contrast, the pit functions as a chamber eye with a pinhole aperture and a sensory membrane suspended in the pit. Rather than utilizing quantum detection, the membrane is heated by thermal infrared radiation (range ~5–20 µm). Radiation entering from different directions forms a temperature pattern sensed by receptors that respond to receptor temperature changes at least as small as 0.003°C (Bullock and Diecke, 1956). This sensitivity means that objects with temperatures contrasting by a few degrees Celsius moving within its field of view and less than a few tens of meters distant create a detectable neural image of the changing temperature patterns on the membrane (Bakken, 2007; Bakken and Krochmal, 2007).

Neurologically, the sensory input from the temperature-sensitive membrane within the pit is processed through the lateral descending trigeminal tract (LTTD) and nucleus reticularis caloris (RC), integrated with sensory input from the lateral eyes in the optic tectum, and forwarded to the telencephalon (Berson and Hartline, 1988; Hartline et al., 1978). The hypothesis that a multispectral image is presented to the telencephalon is supported by this neurological anatomy and disruption of prey targeting resulting from contralateral blocking of eyes and pits (Chen et al., 2012). However, the spatial resolution of the resulting neural image that informs behavior is unknown.

The geometric optics of the loreal pit are defined by its morphology. The light energy from a source point that passes through the aperture falls on an area of the sensory membrane called the point spread function (PSF), measured in angular degrees. A small aperture creates a small PSF and thus a well-resolved image, but admits little radiant energy. Enlarging the aperture admits more energy, but the larger PSF impairs resolution (Land and Fernald, 1992). The pit organ has a relatively large aperture which varies with view angle (Bakken et al., 2012; Kohl et al., 2012). Biophysical modeling indicates that, while detectable temperature patterns result, the angular resolution of the membrane temperature image is poor (Bakken and Krochmal, 2007). Bakken et al. (2012) found variation in pit morphology affecting membrane image resolution among four individuals of four species. The *Crotalus atrox* specimen had the highest resolution, *Crotalus oreganus* and *Crotalus horridus* had intermediate resolution, and the Asian white-lipped palm viper *Cryptelytrops albolabris* had

<sup>1</sup>Department of Biology, San Diego State University, San Diego, CA 92182, USA.

<sup>2</sup>4431 East Park Avenue, Terre Haute, IN 47805, USA.

\*These authors contributed equally to this work

†Authors for correspondence: (rclark@sdsu.edu; george.bakken@indstate.edu)

© R.W.C., 0000-0002-1100-1856

the lowest. However, even for *C. atrox*, the pit membrane resolution was extremely poor, and the sensory and ecological significance of the observed interspecific variation remains to be determined.

The neural image informing behavior is not necessarily defined by the pit membrane image. Computer image sharpening is a well-established technology, and it is theoretically possible that processing in the central nervous system could sharpen the membrane image (Sichert et al., 2006). Indeed, neurophysiological studies indicate that neural sharpening occurs in the LTTD of *C. oreganus*, and effectively reduces the effective aperture diameter (and thus the PSF) by half (Stanford and Hartline, 1980, 1984) (see Fig. 1). Recent studies indicate that the LTTD and RC also process information from the pit organ to enhance contrast, sense motion and determine directionality (Bothe et al., 2018; Bothe et al., 2019; Kaldenbach et al., 2016; Kohl et al., 2014). This merger might, for example, allow the optical input to train the neural network processing thermal information to further enhance resolution. However, a study of a congenitally one-eyed python suggested visual and thermal senses were ontogenetically independent in pythons (Grace and Woodward, 2001), and the predatory performance of a congenitally blind *C. oreganus* was nearly normal (Kardong and Mackessy, 1991). While these studies suggest pit vipers possess a multispectral sense combining visual and thermal input, the neurophysiological details of the entire system, including whether further thermal image sharpening occurs in the optic tectum and telencephalon, are not sufficiently known to estimate the acuity of the neural thermal images informing behavior.

Behaviors observed in free-ranging snakes have raised interesting questions related to the resolution of the neural thermal image. Snakes are most likely to detect and strike at prey that show stronger temperature contrast with their background (Schraft et al., 2018; Shine et al., 2002). Notably, a patterned thermal background may impair predatory target detection. Sidewinders (*Crotalus cerastes*; Schraft et al., 2019) and Chinese pit vipers (*Gloydius sheddaensis*; Shine and Sun, 2002) choosing ambush sites appear to orient toward the background with the least structure, suggesting that background temperature patterning could interfere with effective predation. This would be expected if the neural image has poor resolution.

However, other behaviors suggest better resolution. Specifically, the body temperatures of small mammals change during antipredator interactions with rattlesnakes, perhaps as a result of elevated metabolism related to flight-or-fight responses (Cabanac and Briese, 1992; Southwick, 1973). Resulting surface temperatures show interesting patterns. California ground squirrels have higher temperatures in the tail region when interacting with western rattlesnakes (*Crotalus oreganus*) (Rundus et al., 2007), and Merriam's kangaroo rats show increased head, snout and hindleg temperature after detecting Mojave rattlesnakes (*Crotalus scutulatus*) (Schraft and Clark, 2017; Schraft et al., 2018). In both cases, the degree of temperature change was relatively minor and localized to a particular part of the body. While likely related to the use of appendages to dissipate metabolic heat (e.g. Conley and Porter, 1985), signaling functions have been suggested with some experimental support (Rundus et al., 2007). Although such changes are readily detected with a thermal imaging camera, it remains to be demonstrated that the pit organ system could resolve those details.

Behavioral experiments can evaluate the neural image informing behavior, and thus assay the overall performance of a sensory system. Laboratory studies of facial pit function to date have presented pit vipers with both static and moving thermal targets that

strongly contrasted with a uniform thermal background (e.g. Bakken et al., 2018; Chen et al., 2017; De Cock Buning et al., 1981; Ebert and Westhoff, 2006; Krochmal and Bakken, 2003; Van Dyke and Grace, 2010). While these experiments maximize the potential for pit vipers to detect target stimuli and assay sensitivity to thermal contrast, they provide little information about angular resolution.

Our study therefore addressed the resolution of the neural image informing behavior with an evoked behavior assay of facial pit spatial resolution. We designed an apparatus and experiment that could allow us to use behavioral responses to create a thermal image contrast sensitivity function (CSF) plot. The CSF is a plot of contrast sensitivity of an imaging system as a function of the spatial frequency of the source (units  $\text{deg}^{-1}$ ). Vision studies typically record neural or behavioral responses to bar or checkerboard stimuli with defined spatial frequencies to compare the visual performance of different animal species (reviewed by Da Silva Souza et al., 2011). We used the western rattlesnake, *Crotalus oreganus*, as our study species as it has been used extensively in facial pit studies that provide context and supporting information for our study (Bakken et al., 2018; Berson and Hartline, 1988; Hartline et al., 1978; Haverly and Kardong, 1996; Kardong, 1992; Newman and Hartline, 1981; Rundus et al., 2007; Stanford and Hartline, 1984). Importantly, this species was used in a study that determined the PSF as represented in the LTTD (Stanford and Hartline, 1980). It is known that this species further processes the pit image in higher brain centers and merges it with visual information in the optic tectum (Berson and Hartline, 1988; Newman and Hartline, 1981).

Our experiment was designed to test the hypothesis that processing in higher centers (RC, optic tectum and telencephalon) may further improve resolution. Our null hypothesis was based on the degree of image sharpening demonstrated in the LTTD (Stanford and Hartline, 1984). If the CSF determined in our apparatus indicated a higher spatial frequency response than the ca.  $0.1 \text{ deg}^{-1}$  demonstrated in the LTTD (see fig. 6 of Stanford and Hartline, 1984), we could reject the null hypothesis and suggest that additional image sharpening occurs in the RC, optic tectum and/or telencephalon of *C. oreganus*. To test this hypothesis, we modified a laboratory-based apparatus that reliably elicited snake responses to thermal targets in a previous study (Bakken et al., 2018). We added perforated metal grids to the apparatus to create patterned thermal backgrounds behind a moving pendulum with a temperature-regulated bob. Our apparatus design was based on the prediction that a target with a uniform surface temperature moving over a uniformly patterned thermal background with the same average temperature would release a response from a pit viper only if the background pattern could be detected. Otherwise, the scene would appear to have a uniform temperature identical to the target temperature, and the target would thus be invisible. This is the same principle used by computer displays, where a pattern of colored dots, individually too small to be resolved by human eyes, creates the appearance of a continuous shaded surface. Thus, if the background was detected, we predicted the response would be stronger to targets moving across coarser or higher temperature contrast thermal grids, and we could use this relationship to define a CSF for the pit organ system. Knowledge of the PSF or CSF can be used to simulate the snake's thermal image of any scene recorded by a thermal camera (Bakken and Krochmal, 2007). The pattern dimensions were selected to test for a response to higher spatial frequencies that would indicate image sharpening beyond that established for the LTTD, ca.  $0.1 \text{ deg}^{-1}$ .

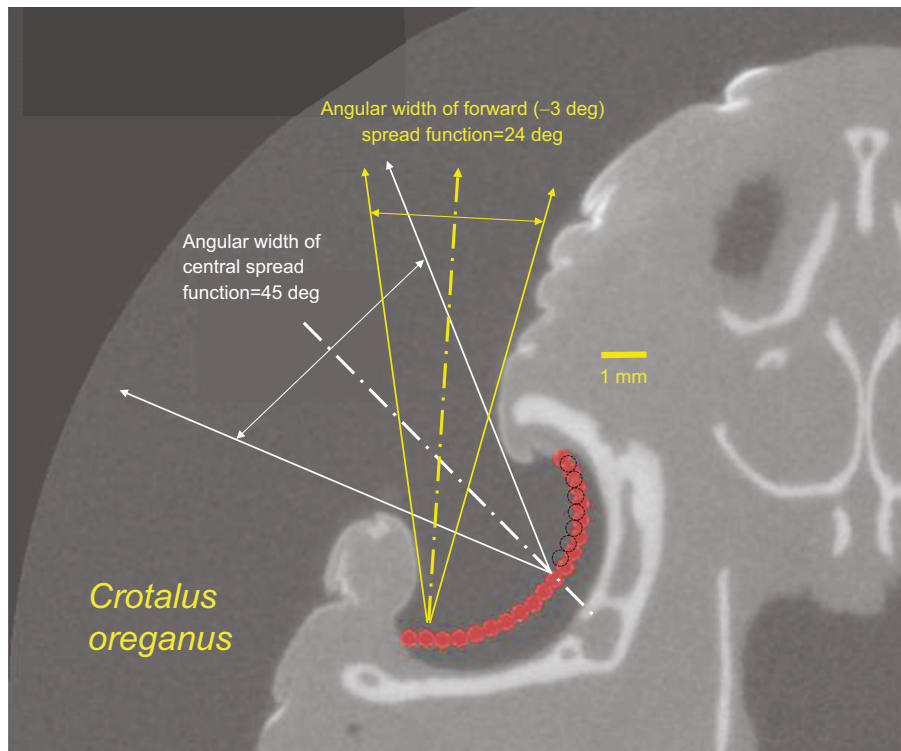

**Fig. 1. Geometric spread functions for *Crotalus oreganus*.** This X-ray tomography view of the nose and facial pit has been marked to indicate the view angle of a single sensory ending on the pit membrane corresponding to the angular neuron response in the lateral descending trigeminal tract (LTTD) in fig. 6 of Stanford and Hartline (1984). The angular width of the neural response field in the forward ( $\sim 3$  deg) direction was ca. 10 deg, versus 24 deg for the geometric view angle in this image, indicating ca. 2 $\times$  neural sharpening. Similarly, the typical lateral neural response field was ca. 20 deg, again about half that of the lateral geometric view angle in this image. The red markers indicate the position of the sensory membrane suspended in the pit; 19 3D markers fit in 110 deg. This section is from the same *C. oreganus* specimen used by Bakken et al. (2012).

## MATERIALS AND METHODS

### Study subjects

Experimental subjects were 17 adult western rattlesnakes (*Crotalus oreganus* Holbrook 1840) that were long-term captives in the vivarium at San Diego State University. Individuals had been in captivity for varying periods, but all for longer than a year. Twelve individuals were ‘problem’ snakes that were being translocated away from populated areas of Camp Pendleton Marine Corps Base in San Diego, CA, USA, and five had been collected from other areas of San Diego County (California Fish and Wildlife Scientific Collecting Permit SC-9704). Animals were housed in 60 $\times$ 40 $\times$ 40 cm plastic terraria with paper substrate, and provided with water *ad libitum*. Each terrarium had a wooden hide box that snakes used as a retreat site. This box had a sliding door that could be closed, and thereby used to transport snakes to and from the experimental apparatus with no direct handling. Procedures were approved by the SDSU IACUC, protocol APF 19-08-009C.

### Experimental apparatus

We used a modification of the experimental apparatus described in Bakken et al. (2018). In brief, the apparatus consisted of a pendulum bob moving in front of a 61 $\times$ 41 cm background consisting of a perforated plate mounted 3 cm in front of a heated backing plate with a uniform, regulated temperature. The separation from the heated backing plate was great enough that the perforated plate remained near air temperature. Together, the backing and perforated plates established a two-temperature patterned backing with defined contrast and spatial frequency. By adjusting the temperature of the backing plate relative to air temperature, we could establish specific background pattern temperature contrasts (Fig. 1).

Each perforated plate consisted of a 2 mm thick aluminium sheet perforated with a hexagonal pattern of regularly spaced circular holes to create a grid with a defined spatial frequency

approximating the checkerboard stimulus used in visual studies. These had a 1:1 ratio of metal to open space, such that the average background temperature was the average of the temperatures of the backing and perforated plates (Fig. 2). We used six plates, with 8, 13, 19, 25, 32 and 38 mm diameter perforations in a hexagonal pattern with a center-to-center distance of 1.347 $\times$ diameter. Although we conducted experiments in complete darkness to eliminate the possibility of visual stimuli, the backing plate, the perforated plate and the pendulum bob were all painted a uniform flat black (thermal emissivity ca. 0.98; 1916 Ultra-Flat Black, Rust-Oleum, Vernon Hills, IL, USA) to further reduce the possibility of visual stimuli, and also ensure emitted thermal radiation was accurately related to temperature.

To measure background pattern temperatures, four thermocouples were embedded in the backing plate. Each perforated plate also had four thermocouples, cemented to the back using steel-filled epoxy resin (JB Weld Steelstik 8267-S). Both sets of four thermocouples were connected in an equal-arm ‘spider’ pattern that sensed average temperatures with 0.1 $^{\circ}$ C resolution. Temperatures were recorded by a digital data logger (CR23X, Campbell Scientific, Logan, UT, USA). Temperature uniformity was verified by thermography.

The pendulum bob, suspended 3 cm in front of the perforated plate, acted as the stimulus target. It consisted of a hexagonal aluminium plate (7.0 cm across the flats $\times$ 0.63 cm thick) with a square Peltier element (5 $\times$ 5 cm; model 12711-9M31-24CW, Custom Thermoelectric, Bishopville, MD, USA) and heat sink cemented to the back. It was suspended from two 1 m lengths of 2.6 mm o.d. hypodermic tubing, each containing one of the 0.8 mm conductor wires supplying power to the Peltier element. Each tube also contained a Teflon-insulated duplex thermocouple with 0.013 mm diameter conductors (type TT, Omega, Norwalk, CT, USA). The sensing tips of these thermocouples were electrically



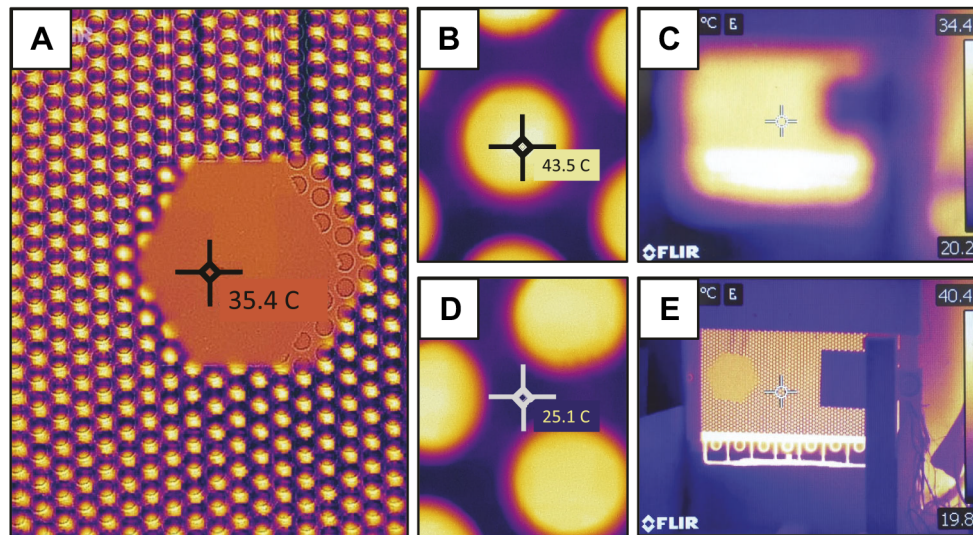

**Fig. 2. Thermal images demonstrating the experimental set up.** The hexagonal pendulum target (A) in front of a patterned thermal background. The thermal background (A) was made by placing an aluminium sheet with 8 mm circular perforations in a gridded pattern in front of a warmed epoxy backing plate. The aluminium plates had different sized perforations, but all created a thermal background with a 1:1 ratio of warm to cool areas. Pendulum target temperatures were set so that they were always at the average temperature of the warm (B) and cool (C) portions of the background. An imaging system that cannot resolve the spatial details of the background, such as a defocused thermal imaging camera (D), does not resolve a target that is distinct from the background. A system that can resolve the background, such as a focused thermal imaging camera (E), can resolve the target pendulum. See Movie 1 for a videographic demonstration of the pendulum moving across the grid with focused and defocused imagery.

insulated and inserted into close-fitting holes drilled 1 cm deep into the edge of the bob. One thermocouple was connected to a custom electronic circuit that controlled the temperature of the bob, and the other monitored bob temperature.

The temperature of the stimulus pendulum bob and background elements was recorded by the datalogger. Datalogger support software (PC 200W 4.4.2, Campbell Scientific, Logan, UT, USA) computed and displayed the average background temperature, the pendulum bob temperature and their difference in real time at the operator station. The operator could thereby adjust the temperature of the pendulum bob to reduce the difference from the average background temperature to 0.3°C or less. We thereby presented test subjects with a moving pendulum bob that had essentially the same temperature as the average temperature of the patterned background it moved across (Fig. 2).

The procedure room in which the tests were conducted was kept between 20 and 22°C, and snakes were housed in this room for at least 4 h prior to testing so that their body temperature conformed to the room temperature. This temperature range is ecologically realistic (many pit vipers in temperate climates are nocturnal, and ambush small mammals and other endothermic prey through the cooler night-time periods). Also, this corresponds to the body temperature at which we found the *C. oreganus* in our previous experiment to be most responsive to our thermal stimuli (Bakken et al., 2018). We did not test snakes that had eaten within the past week, so that test subjects would not be satiated and would be more likely to respond to relatively small moving thermal stimuli that might represent prey.

For each test, the sliding door was inserted in the hide box containing the rattlesnake and transported from the home cage to the procedure room (an adjacent room with no lights), where it remained for at least 4 h to allow the body temperature of the snake to equilibrate with the ambient temperature of the room. Prior to the test, the hide box was placed on a pedestal facing the testing apparatus with the front of the hide box 30 cm from the perforated

plate. The sliding door was attached to a string running through a long, curved copper tube to the operator's station. We could then raise and lower the hide box door remotely to reveal the testing apparatus to the snake. The curve in the copper tube blocked light from the operator's station in the control room. The pendulum bob was held to the side by an electromagnet. When the electromagnet was turned off, the bob was released silently and swung back and forth in front of the perforated plate. A recording video camera using invisible near-infrared illumination allowed us to view the snake at the time of pendulum release and record responses. See Bakken et al. (2018) for further details on the basic design and construction of the apparatus.

### Experimental design

The operation of our experiment is illustrated in Movie 1, which shows a stimulus presentation recorded with a thermal imaging camera (FLIR model T420, FLIR Systems, Inc., Arlington, VA, USA). The pendulum bob moves in front of the metal plate with 8 mm circular perforations, with the bob set to the average temperature of the cool and warm portions of the background. When the camera is defocused, the background is not resolved and the pendulum cannot easily be perceived, but when the camera is refocused so the gridded background is resolved, the bob is seen as a distinct moving object.

Comparative analyses of visual acuity in vertebrates typically present test subjects with a video display of alternating or moving dark and light gratings or checkerboard patterns with spatial frequencies and contrasts as variables. The responses of the animal (eye or head movements, neurophysiological evoked potentials, etc.) indicate when stimuli were perceived by the study subject (e.g. Baker et al., 2007; Keller et al., 2000; Schmid and Wildsoet, 1998; Tappeiner et al., 2012). The data are presented as a CSF, a plot of the response versus the logarithm of spatial frequency (reviewed by Da Silva Souza et al., 2011). The highest spatial frequency that the animal responds to is used as a measure of visual acuity.

We approximated the checkerboard stimulus with grids consisting of perforated plates with center-to-center angular distances between perforations of  $2 \times \tan^{-1}[(1.347 \times \text{diameter}) / (2 \times \text{distance to perforated plate})]$ . The lowest (and thus most detectable) spatial frequency of the pattern is the reciprocal of this angular distance. For our largest (38 mm) perforation at ca. 32–33 cm from the snake's pits, the angular distance is ca. 9 deg and the spatial frequency is ca.  $0.11 \text{ deg}^{-1}$ , approximately equal to that inferred from the best (forward direction) PSF recorded by Stanford and Hartline (1984).

We used a cyclical permutation of different stimulus presentations to create a balanced order of contrast values and perforation sizes presented to the 17 rattlesnakes used. Each was tested with all six metal grids, with the order of trials balanced across study subjects such that either three or occasionally two individuals started the grid sequence at each of the six perforation sizes. A minimum of 3 weeks elapsed between subsequent trials for the same individual. During each trial, the snake was shown the pendulum moving across one gridded background with a series of six different temperature contrasts (the difference between the cool and warm portions of the background). The metal grid conformed closely to the air temperature of the room, 20–22°C. The backing plate temperature was varied using a temperature-controlled water bath (VWR Scientific model 1160, Chicago, IL, USA) to establish background contrast values of approximately 0, 3, 6, 9, 12 and 15°C. As with the perforation sizes, the order of contrast values was balanced so that either two or three individuals began the sequence at each of the six contrast values. In order to alter the contrast value between each pendulum presentation, the opaque door of the box containing the test subject was lowered and a researcher entered the procedure room to adjust the temperature of the water bath heating the backing plate and reattach the pendulum to the electromagnet. The pendulum temperature was then readjusted so that at the time of release it matched (within 0.3°C) the average temperature of the perforated aluminium and backing plates. Between 5 and 30 min elapsed between presentations, depending on the time necessary for the snake to cease spontaneous activity and for the pendulum to either heat or cool to the next target contrast value.

Using this design, all 17 snakes were tested with all six background perforations, and during each test, all six contrast values were presented, resulting in a total of 612 stimulus presentations. To minimize habituation, we rotated through all 17 experimental subjects, leading to a minimum 3 week period between subsequent trials for an individual snake. This procedure successfully eliminated habituation in a previous study (Bakken et al., 2018). Given the large number of stimulus presentations, we also performed a post-study habituation control trial with the perforated metal plate removed so the background was uniform. This established the same experimental condition as in Bakken et al. (2018), so that it could be used as a reference for the responsiveness of test subjects in our apparatus.

### Behavioral scoring and statistical analysis

As in our previous experiment (Bakken et al., 2018), we used the evoked behavioral response of the snakes in the form of tongue flicks and head movements to score responses to stimuli. Once snakes were positioned in the apparatus, they were allowed to settle for at least 3 min before any test was conducted. We also did not release the pendulum stimulus in any trial until the snake had exhibited at least 30 s of complete stillness (no movements or tongue flicks).

After releasing the pendulum stimulus, we scored behaviors during the 5 s following the pendulum release, corresponding to the first three swings of the pendulum. A positive response was scored if any tongue flicks (TFs) or head movements (HMs) were exhibited during this 5 s period, and a negative response if no overt movements were exhibited. To quantify TF and HM response strength, we counted the total number of video frames (out of 150) where the tongue was extruded or the head had changed position from the previous frame. Thus, each pendulum presentation resulted in three response variables: (1) yes/no response to stimulus, (2) TF score and (3) HM score.

We examined these three response variables independently using a generalized linear mixed model (GLMM) framework. Because our TF and HM scores are zero-inflated count data, we used negative binomial distributions for these responses, and a binomial distribution for the yes/no response data. We included the diameter of perforations, the contrast between warm and cool pattern elements and their interaction as fixed factors. We included a random intercept for snake ID to account for repeated measures on the same individuals. Because we designed the experiment to balance trial order and stimulus order in a permuted fashion, we did not include these as factors in the model, but we did visualize them to see whether there was any apparent association with our response variables. All analyses were performed in R version 4.0.5 using the package *glmmTMB* for mixed model analysis. The raw data are available in Table S1.

To aid our interpretation of the results, we used GNU Octave 5.1.0.0 (<https://www.gnu.org/software/octave/doc/v5.2.0/>) to simulate an expected contrast sensitivity function (Da Silva Souza et al., 2011) assuming a disk spread function of 10 deg angular diameter using the methods of Bakken and Krochmal (2007). The 10 deg diameter is based on the best neurophysiological result (recorded directly in front of the snake) found by Stanford and Hartline (1980) in the LTTD of snakes of the same study species as ours. The contrast response function is modeled as the ratio of the background pattern contrast in the image to that in the source scene (Fig. 3). Sensitivity functions were modeled assuming (1) the standard sinusoidal background used in visual experiments, (2) the hexagonal perforated plate geometry used in our experiment, and (3) the average over 27 positions of one simulated swing of the hexagonal pendulum over the perforated plate. The spatial frequencies and perforation diameters of our plates are indicated by labeled vertical lines in Fig. 3. If Stanford and Hartline (1984) adequately described the final neural image, these functions lead us to expect a weak response to the largest perforations and no response to the smaller perforations. A response to the higher angular frequencies of the smaller perforations would provide evidence for additional overall neural image sharpening beyond the LTTD, as well as the data needed to generate a CSF describing any such enhanced facial pit imaging. A lack of response would indicate no further sharpening beyond the LTTD, with functional angular resolution perhaps no better than the 20 deg found for other view angles (Stanford and Hartline, 1980, 1984).

### RESULTS

Snakes in trials with patterned backgrounds exhibited very limited responsiveness to the pendulum stimulus, regardless of perforation size or the degree of contrast between the target and cool portions of the grid (Fig. 4). The TF response model indicated that snake responsiveness was not affected by perforation size, contrast or the interaction between perforation size and contrast (Fig. 4, Table 1). Similar results were obtained for the HM and binary response

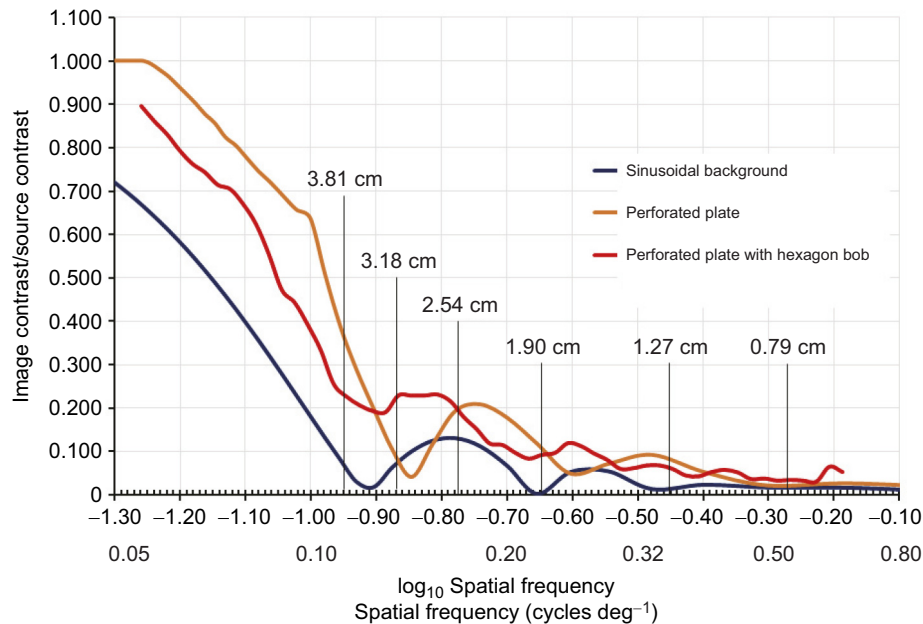

**Fig. 3. Reference hypothetical contrast sensitivity function assuming a disk spread function of 10 deg angular diameter versus the fundamental spatial frequency of different sources.** The response function is modeled as the ratio of the contrast in the image to the contrast in the source scene. Results are shown for a standard sinusoidal background as used in visual experiments (black), the hexagonal perforated plate geometry used in our experiment (orange), and the average over 27 positions of one simulated swing of our hexagonal pendulum bob moving over the perforated plate (red). The 10 deg disk spread function is based on the best neurophysiological result obtained by Stanford and Hartline (1984). The perforated plate CSF predicts a stronger but variable response at higher spatial frequencies than a pure sinusoidal source, but for all backgrounds the indicated resolution found by extrapolating the curves from ca. 0.6–0.3 to 0 is approximately the same (spatial frequency ca. 0.12 deg<sup>-1</sup>). The spatial frequencies and perforation diameters of our plates are indicated by the labeled vertical lines. The detectability of aliased patterns appears as oscillations at higher spatial frequencies.

models (Table 1). Even at the highest levels of contrast and largest perforation sizes, snakes exhibited similar background responsiveness to all levels of target contrast.

Our post-experiment control test showed that the tested snakes had not habituated to the testing apparatus, as the same snakes responded strongly to the pendulum stimulus when presented with a homogeneous thermal background after the main study. Although small differences in experimental design prevent statistical comparisons, the response of snakes in the post-experiment control trial were similar in magnitude to the responses exhibited by snakes in Bakken et al. (2018), where the same species and apparatus and similar testing conditions were used (Fig. 4).

## DISCUSSION

### Sensory performance

Although the pit organ aids prey detection and targeting (Goris, 2011), as well as locating thermal refuges (Krochmal and Bakken, 2003), our experimental results provided no evidence that the neural thermal image formed by *C. oreganus* can resolve anything with an angular extent less than or equal to the ca. 9–10 deg (spatial frequency ca. 0.1 deg<sup>-1</sup>) indicated for the forward direction by Stanford and Hartline (1984; see their fig. 6). The range of higher spatial frequencies (0.11–0.54 deg<sup>-1</sup>) covered in our study did not allow us to either estimate the threshold spatial frequency at which our snakes could actually resolve spatial details or generate a measured CSF to replace our prediction (Fig. 3) based on Stanford and Hartline's (1980, 1984) work. Thus, we cannot reject our null hypothesis that, for *C. oreganus*, thermal image sharpening occurs only in the LTDD.

Our results for *C. oreganus* may not apply precisely to other species, as Bakken et al. (2012) found significant variation among

the pit apertures of specimens of four species, with the *C. atrox* specimen having a significantly smaller relative aperture, and hence better resolution on the facial pit membrane, than the *C. oreganus* specimen. Conversely, *C. horridus* and *C. albolabris* specimens had a larger aperture. These differences may or may not carry through neural processing to the neural image informing behavior. Therefore, we conclude that it is important to repeat our study on other species before generalizing.

Clearly, it is not accurate to use high-resolution images and videos as recorded by commercial thermal imagers to visualize the thermal radiation image that a pit viper might perceive (e.g. in den Bosch, 1983; Kardong, 1986; Rundus et al., 2007). However, further image processing as has been done for the pit membrane image may provide useful visualizations (Bakken et al., 2012; Bakken and Krochmal, 2007). For an example of computed thermal imaging of a natural scene based on the neural PSF derived from Stanford and Hartline (1984), see Schraft et al. (2019).

As an assay of the overall performance of thermal imaging, including neural processing, our experimental results redirect attention to the question of how thermal and visual images with radically different angular resolutions are merged in the optic tectum, and how the results are presented to the telencephalon to inform behavior. The presence of neurons responding to both visual and infrared inputs provides the primary evidence for a multispectral visual image (Goris, 2011; Gower et al., 2019; Hartline et al., 1978; Newman and Hartline, 1981). However, the spatiotopic maps of the receptive fields for thermal and visual stimuli were poorly aligned, which argues against a multispectral neural image (Hartline et al., 1978). Together with our results, it is not clear that there is a basis for postulating a multispectral neural image in the telencephalon, let alone one with angular resolution of thermal imagers.



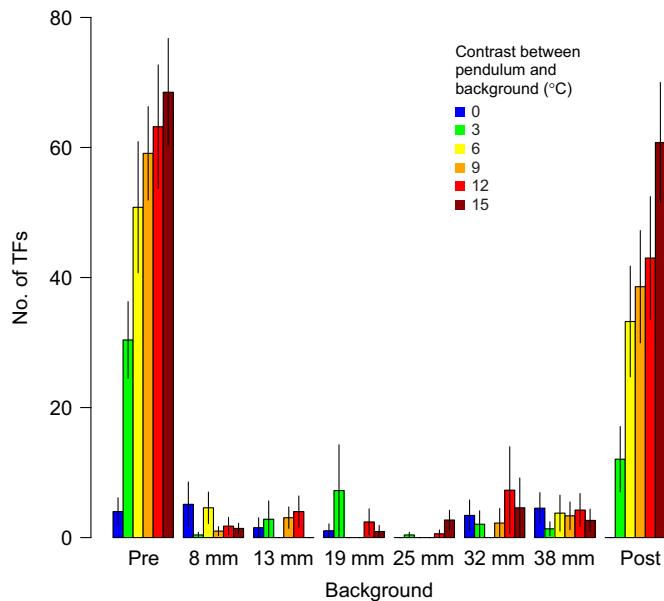

**Fig. 4. Tongue flick responses to thermal targets presented to snakes across a range of background patterns and contrast values.** Histograms indicate the mean  $\pm$  s.e.m. number of video frames in which the tongue was extruded (number of tongue flicks, TFs). There was no evidence of a significant response to the moving pendulum for any contrast or background pattern (perforation diameter). Habituation due to repeated use of each animal in the long series of experiments might account for this non-response. The figure includes post-experiment results with the grid removed, showing snakes still retain adequate responsiveness to the stimulus when the thermal background is homogeneous ('Post'). The responsiveness of snakes in an earlier study (Bakken et al., 2018) using the same apparatus with no background plate is shown for comparison ('Pre').  $N=612$  trials on 17 snakes.

Newman and Hartline (1981) reviewed studies of many species, demonstrating that other low-resolution spatial inputs (auditory, somatosensory) were merged with visual information in the tectum with similar misalignment of the spatiotopic maps. They suggested that the low-resolution spatial information, rather than forming a multispectral image, might serve as a feature detector by directing attention to visual inputs with certain characteristics, such as a moving warm animal versus a windblown leaf. Synergistic interaction of visible and thermal input is suggested by the reduced strike range when only thermal input is available (see table 1 of Kardong, 1992).

We conclude that behavioral research is needed on all aspects of the integration of thermal and visual information. Neurophysiological (Hartline et al., 1978) and behavioral (Chen et al., 2012) studies suggest that the pit organ functions best as part of an integrated system, but our tests and similar studies by others (e.g. Chen et al., 2012; Ebert and Westhoff, 2006; Kardong, 1992) have all been conducted with the visual system disabled by darkness or blindfolds – conditions that isolate the thermal sense, but block the ability to integrate visual and thermal stimuli.

## Ecology

A completely dark testing environment is, in fact, not representative of the typical ecological setting for ambush-hunting pit vipers. The limited research into snake visual systems indicates that they are adapted for low-light environments, similar to other nocturnal predators (Baker et al., 2007; Bittencourta et al., 2019; Simoes et al., 2016). It is likely that even when hunting at night, under deep forest

canopies or heavy cloud cover, there is enough light for visual stimuli to be salient. Foraging in complete darkness would occur but rarely. Therefore, it is possible that synergy between visual and thermal stimuli occurs in ecological situations where both stimuli are present at submaximal levels.

Most studies of pit organ function have been conducted in laboratory environments, in arenas that lack the thermal heterogeneity common to field settings. Background features may result in the thermal representation of a prey animal displaced from its actual location (see fig. 4B of Bakken and Krochmal, 2007; and fig. 4C,F of Bakken et al., 2012). Our results further indicate that a prey item may even not be visible in a thermal radiation image with a complex background. Indeed, field studies (Schraft et al., 2019; Shine and Sun, 2002) indicate snakes in ambush posture avoid thermally heterogeneous backgrounds, suggesting that complex thermal backgrounds impair prey targeting.

Provided that the target can be isolated against its background, lack of detail does not necessarily impair targeting, as the center of a large, diffuse, poorly resolved object can be located surprisingly accurately (Kontsevich and Tyler, 1998; Yovel et al., 2010). Thus, targeting prey and locating thermal refuges is feasible even with low resolution (Krochmal and Bakken, 2003). Some studies suggesting detailed imaging used uniform thermal backgrounds, and thus are actually consistent with our results. Kardong (1986) found that *C. oreganus* struck preferentially at the head of mice to avoid retaliatory bites, but with their pits blocked, the range at which they would strike was but 5 cm (Kardong, 1992). At this range, with a ca. 1.5 cm long head, the angle subtended is ca.  $\tan^{-1}(1.5/5)=16$  deg ( $0.06$  deg $^{-1}$ ). Similarly, Rundus et al. (2007) found that California ground squirrels, *Otospermophilus* (*Spermophilus*) *beecheyi*, vasodilate their 13–23 cm long tail and flag at rattlesnakes which respond, suggesting decent resolution. However, the definitive test used a uniform background with a life-size taxidermic model placed 40 cm from the snake. The tail thus presented a target that subtended 18–30 deg ( $0.6$ – $0.3$  deg $^{-1}$ ). Further, motion by a thermal radiation source increases the neural response (Hartline et al., 1978). Even though the temperature

**Table 1. Results from models of tongue flick, head movement and binary response as a function of target contrast, perforation size and the interaction between contrast and perforation size**

|                      | Estimate | s.e. | z-value | P-value |
|----------------------|----------|------|---------|---------|
| TF response          |          |      |         |         |
| Intercept            | 0.69     | 1.09 | 0.63    | 0.53    |
| Contrast             | −0.07    | 0.11 | −0.63   | 0.53    |
| Perforation size     | −0.18    | 1.03 | −0.17   | 0.87    |
| Contrast×Perforation | 0.05     | 0.11 | 0.52    | 0.60    |
| HM response          |          |      |         |         |
| Intercept            | −5.82    | 3.23 | −1.80   | 0.07    |
| Contrast             | −0.22    | 0.25 | −0.87   | 0.38    |
| Perforation size     | −7.94    | 4.43 | −1.79   | 0.07    |
| Contrast×Perforation | 0.59     | 0.38 | 1.55    | 0.12    |
| Binary response      |          |      |         |         |
| Intercept            | −3.38    | 0.71 | −4.73   | 0.00    |
| Contrast             | 0.07     | 0.07 | 1.04    | 0.30    |
| Perforation size     | 0.63     | 0.64 | 0.99    | 0.32    |
| Contrast×Perforation | −0.05    | 0.07 | −0.67   | 0.50    |

Tongue flick (TF) response is the number of frames (total 150) in which the tongue was extruded; head movement (HM) response is the number of frames (total 150) in which the head had moved from its position in the previous frame; and binary response (yes/no) indicates whether a snake responded to target presentation. All models included a random intercept for snake identity.  $N=612$  trials on 17 snakes.

contrast was only 2°C, the tail stimulus is equivalent to a pendulum stimulus that produced ca. 30% of the maximum response in Bakken et al. (2018).

However, given complex thermal backgrounds in natural habitats, pit vipers may be unable to resolve sufficient spatial detail to perceive the thermographically recorded regional body temperature changes of smaller prey at greater distances. In the field, snakes may launch predatory strikes at distances of 40–50 cm (R.W.C., personal observation). This would change the angle subtended by the head of a mouse to 1.7–2.1 deg (0.6–0.5 deg<sup>-1</sup>), much less than the 16 deg in situations where snakes struck using only pit inputs in the study by Kardong (1992). Snakes might strike at the strongest signal, but with background interference, the center of the strongest signal may not coincide with the head (Bakken et al., 2012; Bakken and Krochmal, 2007). Regional temperature differences in prey, such as those documented in Schraft and Clark (2017), would typically be too minor to be distinguished.

### Evolution

The evolutionary origin of the pit viper facial pit is essentially unknown. The oldest viper fossils are not significantly different from modern forms, and the fossil record of pit vipers is effectively absent in the south–southeast Asian area of origination (Szyndlar and Rage, 2002). In any event, fossils only rarely provide evidence for physiological or ecological selection processes. Thus, we are left to speculate using general principles.

The neuroanatomical evidence for a merger between visual and thermal radiation has implied a multispectral neural image with decent resolution (Berson and Hartline, 1988; Newman and Hartline, 1981). Gower et al. (2019) compared visual systems of vipers with and without pits, and argued that thermal radiation imaging evolved as an elaboration of the existing visual system.

However, the behavioral results of this study support pit membrane image modeling that indicated pit organs are not able to resolve detailed spatial pattern and most effectively detect objects with substantial temperature contrast moving across homogeneous thermal backgrounds. (Bakken et al., 2012; Bakken and Krochmal, 2007). While neural image sharpening improves imaging somewhat, our results show the improvement is not sufficient to alter these conclusions.

Krochmal et al. (2004) and Bakken and Krochmal (2007) speculated that the ancestral facial pit was comparatively insensitive to receptor temperature change and had little angular resolution. The sense would possibly arise in a habitat with strong temperature contrasts. Selection might favor a relatively insensitive system using a simple directional mechanism such as null detection with receptors on opposite sides of the face. They suggested several scenarios with strong thermal contrast and minimal resolution requirements. First, the ability to sense thermal radiation indicating substantial habitat temperature differences might aid thermoregulation, for example by avoiding dangerously sun-heated patches on a dark substrate that provides limited visual indication of the strength of incident sunlight, or by finding warm nocturnal basking sites. Second, the ancestral pit viper may have been arboreal, feeding on endothermic birds or bats that contrasted strongly with a cold sky background (Shine and Sun, 2002; Swinbank, 1963). Third, endothermic prey might be detected by a snake searching cool burrows with little demand for the ability to detect signal direction. Fourth, an approaching larger predator would provide an extended, and thus stronger, signal.

We can only add the possibility that most extant pit vipers are ambush hunters that generally lie in wait for prey for very long periods of time without moving (reviewed in Beaupre and Montgomery, 2007), and so ancestral pit vipers likely also relied on ambush foraging. Perhaps the pit organ operated as an ‘alarm’ system that has or had a lower threshold of activation from stillness (or even sleep) than other sensory systems. Thus, it could serve to arouse an inactive snake and bring the attention of vision to bear when some low-resolution aspect of the thermal radiation field is changing, as when endothermic prey or predators move nearby.

Improving the use of thermal infrared information to inform behavior is a likely feature of the continuing evolution of the thermal radiation sense. Krochmal et al. (2018) provide a possible example. After only one trial, rattlesnakes (*Crotalus* and *Sistrurus*) of seven different species quickly identified and moved toward a cool refuge within a stressful hot environment by sensing thermal radiation alone. All six species of non-rattlesnake pit vipers tested took 5 times as long to move to the cool refuge, and failed to modify their behavior across 12 trials. This absence of learning was also observed in the true viper *Bitis arietans*. As rattlesnakes are the most derived viper clade, this suggests continuing evolution of more effective utilization of thermal infrared information.

### Acknowledgements

For helping with data collection, we thank Noelle Shaw, Morgan Weed, Diana Rios, Carlo Evans, Vanessa Tyler and Lea Sanders. We thank Nathaniel Redetzke for help with obtaining animals for this study. We thank San Diego State University and the SDSU Faculty-Student Mentoring Program for support and funding. We thank the San Diego State University Office of Laboratory Animal Care for support with live animal facilities and Indiana State University for loaning some equipment.

### Competing interests

The authors declare no competing or financial interests.

### Author contributions

Conceptualization: R.W.C., G.S.B.; Methodology: R.W.C., G.S.B., E.J.R., A.S.; Formal analysis: R.W.C., G.S.B.; Investigation: R.W.C., G.S.B., E.J.R., A.S.; Resources: R.W.C., G.S.B.; Data curation: R.W.C.; Writing - original draft: R.W.C.; Writing - review & editing: R.W.C., G.S.B., E.J.R., A.S.; Visualization: R.W.C., G.S.B.; Supervision: R.W.C.; Project administration: R.W.C.; Funding acquisition: R.W.C., G.S.B.

### Funding

San Diego State University (SDSU) and the SDSU Faculty-Student Mentoring Program provided funding for housing and husbandry of the captive rattlesnake population.

### Data availability

All relevant data can be found within the article and its supplementary information.

### References

- Baker, R. A., Gawne, T. J., Loop, M. S. and Pullman, S. (2007). Visual acuity of the midland banded water snake estimated from evoked telencephalic potentials. *J. Comp. Physiol. A* **193**, 865–870. doi:10.1007/s00359-007-0240-z
- Bakken, G. S. (2007). A critique of thermal modeling of snake infrared reception by Jones, Lynn and Stone (2001). *J. Theor. Biol.* **244**, 167–168. doi:10.1016/j.jtbi.2006.07.028
- Bakken, G. S. and Krochmal, A. R. (2007). The imaging properties and sensitivity of the facial pits of pitvipers as determined by optical and heat-transfer analysis. *J. Exp. Biol.* **210**, 2801–2810. doi:10.1242/jeb.006965
- Bakken, G. S., Colayori, S. E. and Duong, T. (2012). Analytical methods for the geometric optics of thermal vision illustrated with four species of pitvipers. *J. Exp. Biol.* **215**, 2621–2629. doi:10.1242/jeb.063495
- Bakken, G. S., Schraft, H. A., Cattell, R. W., Tiu, D. B. and Clark, R. W. (2018). Cooler snakes respond more strongly to infrared stimuli, but we have no idea why. *J. Exp. Biol.* **221**, jeb182121. doi:10.1242/jeb.182121
- Beaupre, S. J. and Montgomery, C. E. (2007). The meaning and consequences of foraging mode in snakes. In *Lizard ecology: The evolutionary consequences of foraging mode* (ed. S. M. Reilly, L. D. McBrayer and D. B. Miles), pp. 334–367. Cambridge, UK: Cambridge University Press.



- Berson, D. M. and Hartline, P. H. (1988). A tecto-rotundo-telencephalic pathway in the rattlesnake: evidence for a forebrain representation of the infrared sense. *J. Neurosci.* **8**, 1074-1088. doi:10.1523/JNEUROSCI.08-03-01074.1988
- Bittencourt, G. B., Hauzman, E., Bonci, D. M. O. and Ventura, D. F. (2019). Photoreceptors morphology and genetics of the visual pigments of *Bothrops jararaca* and *Crotalus durissus terrificus* (Serpentes, Viperidae). *Vision Res.* **158**, 72-77. doi:10.1016/j.visres.2019.02.006
- Bothe, M. S., Luksch, H., Straka, H. and Kohl, T. (2018). Synaptic convergence of afferent inputs in primary infrared-sensitive nucleus (LTTD) neurons of rattlesnakes (Crotalinae) as the origin for sensory contrast enhancement. *J. Exp. Biol.* **221**, jeb185611. doi:10.1242/jeb.185611
- Bothe, M. S., Luksch, H., Straka, H. and Kohl, T. (2019). Neuronal Substrates for Infrared Contrast Enhancement and Motion Detection in Rattlesnakes. *Curr. Biol.* **29**, 1827-1832.e4. doi:10.1016/j.cub.2019.04.035
- Bullock, T. H. and Diecke, F. P. J. (1956). Properties of an infrared receptor. *J. Physiol.* **134**, 47-87. doi:10.1113/jphysiol.1956.sp005624
- Cabanac, A. and Briese, E. (1992). Handling elevates the colonic temperature of mice. *Physiol. Behav.* **51**, 95-98. doi:10.1016/0031-9384(92)90208-J
- Chen, Q., Deng, H., Brauth, S. E., Ding, L. and Tang, Y. (2012). Reduced performance of prey targeting in pit vipers with contralaterally occluded infrared and visual senses. *PLoS One* **7**, e34989. doi:10.1371/journal.pone.0034989
- Chen, Q., Liu, Y., Brauth, S. E., Fang, G. and Tang, Y. (2017). The thermal background determines how the infrared and visual systems interact in pit vipers. *J. Exp. Biol.* **220**, 3103-3109. doi:10.1242/jeb.155382
- Conley, K. E. and Porter, W. P. (1985). Heat loss regulation: the role of appendages and torso in the deer mouse and the white rabbit. *J. Comp. Physiol. B* **155**, 423-431. doi:10.1007/BF00684671
- Da Silva Souza, G., Gomes, B. D. and Silveira, L. C. L. (2011). Comparative neurophysiology of spatial luminance contrast sensitivity. *Psychol. Neurosci.* **4**, 29-48. doi:10.3922/j.psns.2011.1.005
- De Cock Buning, T., Goris, R. C. and Terashima, S.-I. (1981). The role of thermosensitivity in the feeding behavior of the pit viper *Agkistrodon blomhoffi brevicaudus*. *Jpn. J. Herpetol.* **9**, 7-27. doi:10.5358/hsj1972.9.1\_7
- Ebert, J. and Westhoff, G. (2006). Behavioral examination of the infrared sensitivity of rattlesnakes (*Crotalus atrox*). *J. Comp. Physiol. A* **192**, 941-947. doi:10.1007/s00359-006-0131-8
- Goris, R. C. (2011). Infrared organs of snakes: An integral part of vision. *J. Herpetol.* **45**, 2-14. doi:10.1670/10-238.1
- Gower, D., Sampaio, F., Peichl, L., Wagner, H.-J., Loew, E., McLamb, W., Douglas, R. H., Orlov, N., Grace, M. S., Hart, N. et al. (2019). Evolution of the eyes of vipers with and without infrared-sensing pit organs. *Biol. J. Linn. Soc.* **126**, 796-823. doi:10.1093/biolinnean/blz003
- Grace, M. S., Woodward, O. M. (2001). Altered visual experience and acute visual deprivation affect predatory targeting by infrared-imaging boid snakes. *Brain Res.* **919**, 250-258. doi:10.1016/S0169-328X(01)00248-0
- Hartline, P. H., Kass, L. and Loop, M. S. (1978). Merging of modalities in the optic tectum: Infrared and visual integration in rattlesnakes. *Science* **199**, 1225-1229. doi:10.1126/science.628839
- Haverly, J. E. and Kardong, K. V. (1996). Sensory deprivation effects on the predatory behavior of the rattlesnake, *Crotalus viridis oreganus*. *Copeia* **1996**, 419-428. doi:10.2307/1446858
- in den Bosch, H. A. J. (1983). Snout temperatures of reptiles, with special reference to the changes during feeding behavior in *Python molurus bivittatus* (Serpentes, Boidae): a study using thermal radiation. *Amphib-Reptilia* **4**, 49-61. doi:10.1163/156853883X00265
- Kaldenbach, F., Bleckmann, H. and Kohl, T. (2016). Responses of infrared sensitive tectal units of the pitviper *Crotalus atrox* to moving objects. *J. Comp. Physiol. A* **202**, 389-398. doi:10.1007/s00359-016-1076-1
- Kardong, K. V. (1986). Predatory strike behavior of the rattlesnake, *Crotalus viridis oreganus*. *J. Comp. Psychol.* **100**, 304-314. doi:10.1037/0735-7036.100.3.304
- Kardong, K. V. (1992). Proximate factors affecting guidance of the rattlesnake strike. *Zool. Jahrb. Abt. Anatomie* **122**, 233-244.
- Kardong, K. V. and Mackessy, S. P. (1991). The strike behavior of a congenitally blind rattlesnake. *J. Herpetol.* **25**, 208-211. doi:10.2307/1564650
- Keller, J., Strasburger, H., Cerutti, D. T. and Sabel, B. A. (2000). Assessing spatial vision — automated measurement of the contrast-sensitivity function in the hooded rat. *J. Neurosci. Methods* **97**, 103-110. doi:10.1016/S0165-0270(00)00173-4
- Kohl, T., Colayori, S. E., Westhoff, G., Bakken, G. S. and Young, B. A. (2012). Directional sensitivity in the thermal response of the facial pit in western diamondback rattlesnakes (*Crotalus atrox*). *J. Exp. Biol.* **215**, 2630-2636. doi:10.1242/jeb.065896
- Kohl, T., Bothe, M. S., Luksch, H., Straka, H. and Westhoff, G. (2014). Organotopic organization of the primary Infrared Sensitive Nucleus (LTTD) in the western diamondback rattlesnake (*Crotalus atrox*). *J. Comp. Neurol.* **522**, 3943-3959. doi:10.1002/cne.23644
- Kontsevich, L. L. and Tyler, C. W. (1998). How much of the visual object is used in estimating its position? *Vision Res.* **38**, 3025-3029. doi:10.1016/S0042-6989(98)00148-5
- Krochmal, A. R. and Bakken, G. S. (2003). Thermoregulation is the pits: use of thermal radiation for retreat site selection by rattlesnakes. *J. Exp. Biol.* **206**, 2539-2545. doi:10.1242/jeb.00471
- Krochmal, A. R., Bakken, G. S. and Laduc, T. J. (2004). Heat in evolution's kitchen: evolutionary perspectives on the function and origin of the facial pit of pitvipers (Viperidae: Crotalinae). *J. Exp. Biol.* **207**, 4231-4238. doi:10.1242/jeb.01278
- Krochmal, A. R., Place, A. J., Laduc, T. J. and Roth, T. C. (2018). Phylogenetic patterns in learning and decision making in pit vipers (Viperidae: Crotalinae). *Anim. Behav.* **145**, 117-123. doi:10.1016/j.anbehav.2018.09.016
- Land, M. F. and Fernald, R. D. (1992). The evolution of eyes. *Annu. Rev. Neurosci.* **15**, 1-29. doi:10.1146/annurev.ne.15.030192.000245
- Newman, E. R. and Hartline, P. H. (1981). Integration of visual and infrared information in bimodal neurons of the rattlesnake optic tectum. *Science* **213**, 789-791. doi:10.1126/science.7256281
- Rundus, A. S., Owings, D. H., Joshi, S. S., Chinn, E. and Giannini, N. (2007). Ground squirrels use an infrared signal to deter rattlesnake predation. *Proc. Natl. Acad. Sci. USA* **14**, 14372-14376. doi:10.1073/pnas.0702599104
- Schmid, K. L. and Wildoset, C. F. (1998). Assessment of visual acuity and contrast sensitivity in the chick using an optokinetic nystagmus paradigm. *Vision Res.* **38**, 2629-2634. doi:10.1016/S0042-6989(97)00446-X
- Schraft, H. A. and Clark, R. W. (2017). Kangaroo rats change temperature when investigating rattlesnake predators. *Physiol. Behav.* **173**, 174-178. doi:10.1016/j.physbeh.2017.02.004
- Schraft, H. A., Goodman, C. and Clark, R. W. (2018). Do free-ranging rattlesnakes use thermal cues to evaluate prey? *J. Comp. Physiol. A* **204**, 295-303. doi:10.1007/s00359-017-1239-8
- Schraft, H. A., Bakken, G. S. and Clark, R. W. (2019). Infrared-sensing snakes select ambush orientation based on thermal backgrounds. *Sci. Rep.* **9**, 3950. doi:10.1038/s41598-019-40466-0
- Shine, R. and Sun, L.-X. (2002). Arboreal ambush site selection by pit-vipers *Glyodyus shedaoensis*. *Anim. Behav.* **63**, 565-576. doi:10.1006/anbe.2001.1928
- Shine, R., Sun, L.-X., Kearney, M. and Fitzgerald, M. (2002). Thermal correlates of foraging site selection by Chinese pit-vipers (*Glyodyus shedaoensis*, Viperidae). *J. Therm. Biol.* **27**, 405-512. doi:10.1016/S0306-4565(02)00009-8
- Sichert, A. B., Friedel, P. and Van Hemmen, J. L. (2006). Snake's perspective on heat: reconstruction of input using an imperfect detection system. *Phys. Rev. Lett.* **97**, 068105. doi:10.1103/PhysRevLett.97.068105
- Simoës, B. F., Sampaio, F. L., Douglas, R. H., Kodandaramaiah, U., Casewell, N. R., Harrison, R. A., Hart, N. S., Partridge, J. C., Hunt, D. M. and Gower, D. J. (2016). Visual pigments, ocular filters, and the evolution of snake vision. *Mol. Biol. Evol.* **33**, 2483-2495. doi:10.1093/molbev/msw148
- Southwick, E. E. (1973). Remote sensing of body temperature in a captive 25-g bird. *Condor* **75**, 464-466. doi:10.2307/1366571
- Stanford, L. R. and Hartline, P. H. (1980). Spatial sharpening by second-order trigeminal neurons in crotaline infrared system. *Brain Res.* **185**, 115-123. doi:10.1016/0006-8993(80)90676-9
- Stanford, L. R. and Hartline, P. H. (1984). Spatial and temporal integration in primary trigeminal nucleus of rattlesnake infrared system. *J. Neurophysiol.* **51**, 1077-1090. doi:10.1152/jn.1984.51.5.1077
- Swinbank, W. C. (1963). Long-wave radiation from clear skies. *Q. J. R. Meteorol. Soc.* **89**, 339-348. doi:10.1002/qj.49708938105
- Szyndlar, Z. and Rage, J.-C. (2002). Fossil record of the true vipers. In *Biology of the Vipers* (ed. G. W. Schuett and M. Hoggren, M. E. Douglas and H. W. Greene), pp. 419-444. Eagle Mountain, UT: Eagle Mountain Publishing.
- Tappeiner, C., Gerber, S., Enzmann, V., Balmer, J., Jazwinska, A. and Tschopp, M. (2012). Visual acuity and contrast sensitivity of adult zebrafish. *Front. Zool.* **9**, 10. doi:10.1186/1742-9994-9-10
- Van Dyke, J. U. and Grace, M. S. (2010). The role of thermal contrast in infrared-based defensive targeting by the copperhead, *Agkistrodon contortrix*. *Anim. Behav.* **79**, 993-999. doi:10.1016/j.anbehav.2010.01.012
- Yovel, Y., Falk, B., Moss, C. F. and Ulanovsky, N. (2010). Optimal localization by pointing off-axis. *Science* **327**, 701-704. doi:10.1126/science.1183310
